# Supplementary material for: Identification of methicillin-resistant Staphylococcus aureus bacteria using surface-enhanced Raman spectroscopy and machine learning techniques
Source: Royal Society of Chemistry journal article supplement (doi:10.1039/d0an00476f), 2020-01-01
Supplement: d0an00476f1.pdf [file d0an00476f1.pdf]

### Supplementary Information

#### Identification of methicillin-resistant *Staphylococcus aureus* bacteria using surface-enhanced Raman spectroscopy and machine learning techniques

Fatma Uysal Ciloglu,<sup>a</sup> Ayse Mine Saridag,<sup>b</sup> Ibrahim Halil Kilic,<sup>c</sup> Mahmut Tokmakci,<sup>\*a</sup> Mehmet Kahraman,<sup>\*b</sup> and Omer Aydin,<sup>\*a,d,e</sup>

<sup>a</sup>Department of Biomedical Engineering, Erciyes University, Kayseri 38039, Turkey

E-mail: tokmakci@erciyes.edu.tr, omeraydin@eriyes.edu.tr; Tel: +90-352-207-6666/32980

<sup>b</sup>Department of Chemistry, Gaziantep University, Gaziantep 27310, Turkey

E-mail: mskahraman46@gmail.com; Tel: +90-342-317-1940

<sup>c</sup>Department of Biology, Gaziantep University, Gaziantep 27310, Turkey

<sup>d</sup>ERNAM-Nanotechnology Research and Application Center, Erciyes University, Kayseri 38039, Turkey

E-mail: omeraydin@eriyes.edu.tr; Tel: +90-352-207-6666/32984

<sup>e</sup>ERKAM-Clinical Engineering Research and Application Center, Erciyes University, Kayseri 38040, Turkey

E-mail: [omeraydin@eriyes.edu.tr](mailto:omeraydin@eriyes.edu.tr), [biomer@umich.edu](mailto:biomer@umich.edu); Tel: +90-352-207-6666/32984

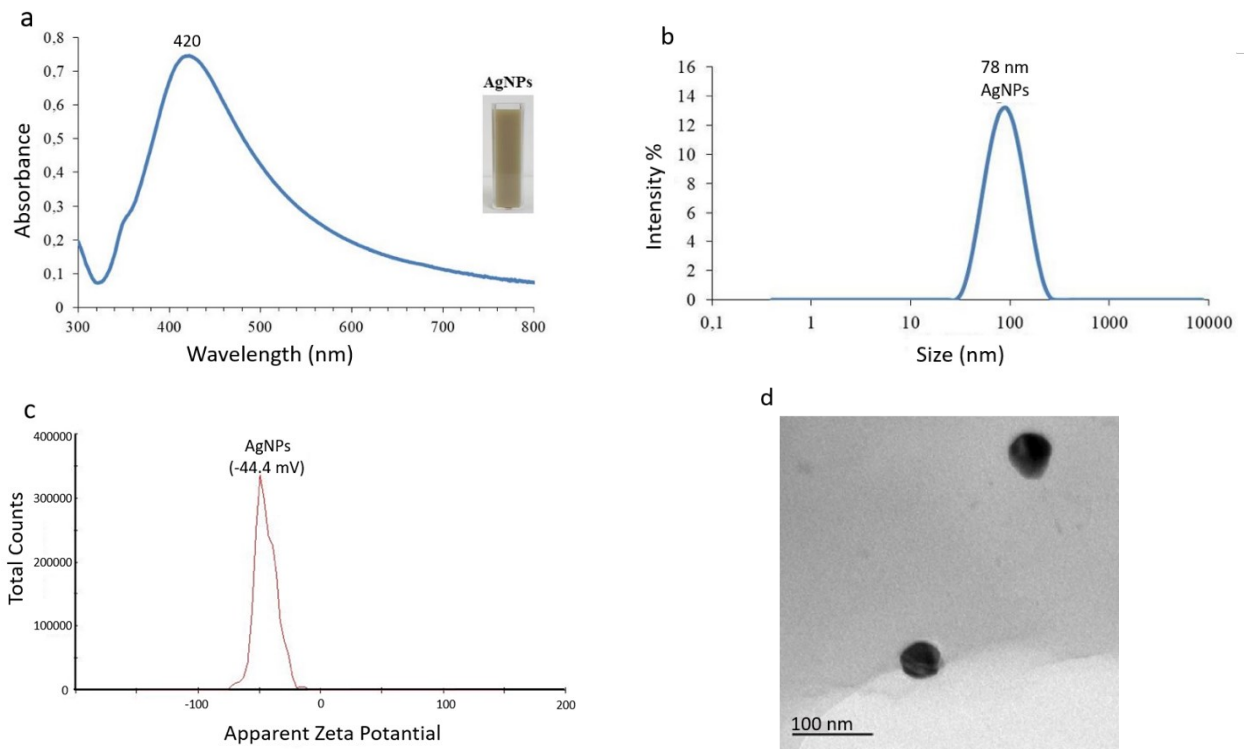

**Figure S1.** Characterization of AgNPs. UV/Vis spektroskopi (a), DLS spectra (b), zeta potential (c) and TEM image (d)

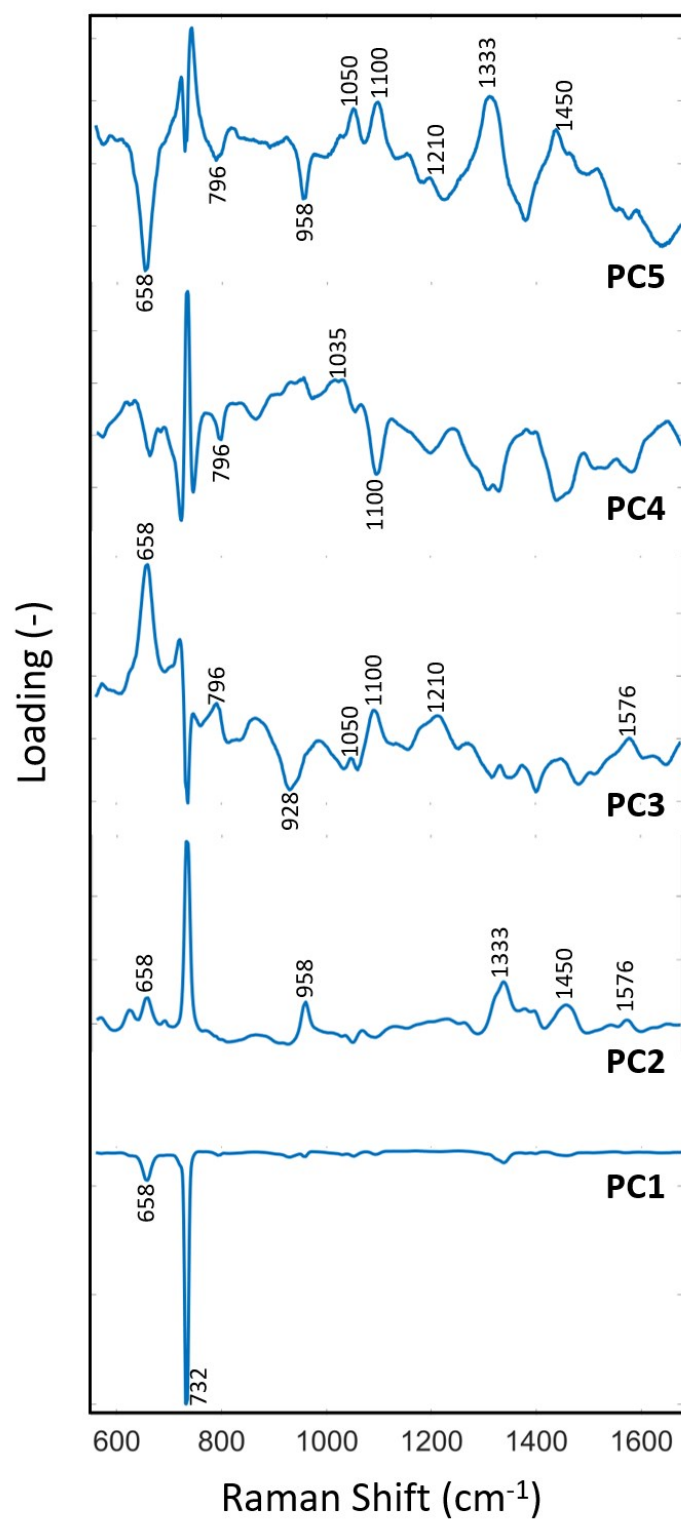

**Figure S2.** The PC loadings plot of the first 5 PCs showing the most important spectral differences between groups

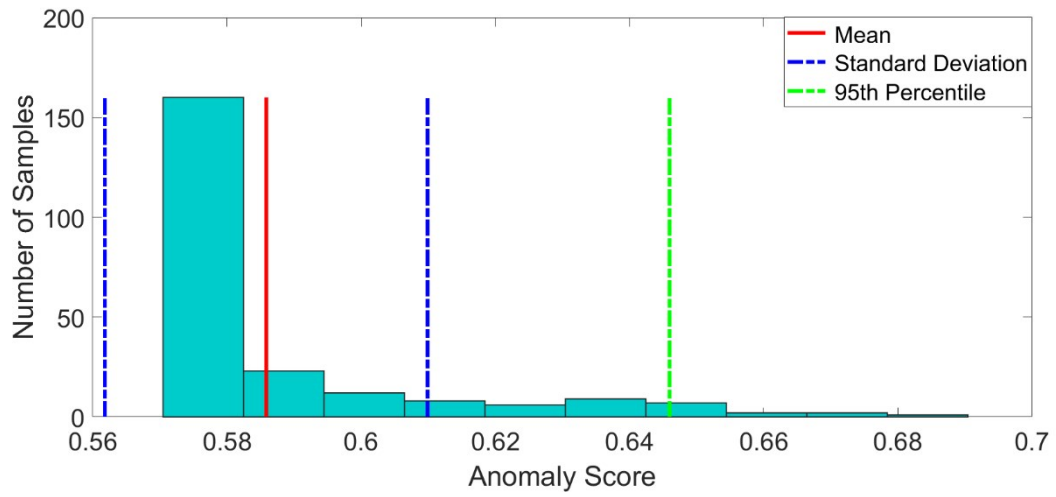

**Figure S3.** Histogram plot of the anomaly score values obtained by the isolation forest algorithm
